# Supplementary material for: Justicidin A Reduces β-Amyloid via Inhibiting Endocytosis of β-Amyloid Precursor Protein
Source: PubMed Central journal article supplement — Biomol Ther (Seoul). 2018 Oct 11;27(3):276–82. doi: 10.4062/biomolther.2018.112 (PMC6513189; doi:10.4062/biomolther.2018.112), 2018-10-11
Supplement: BT-27-276_suppl.pdf [file BT-27-276_suppl.pdf]

## Supplementary Fig. 1

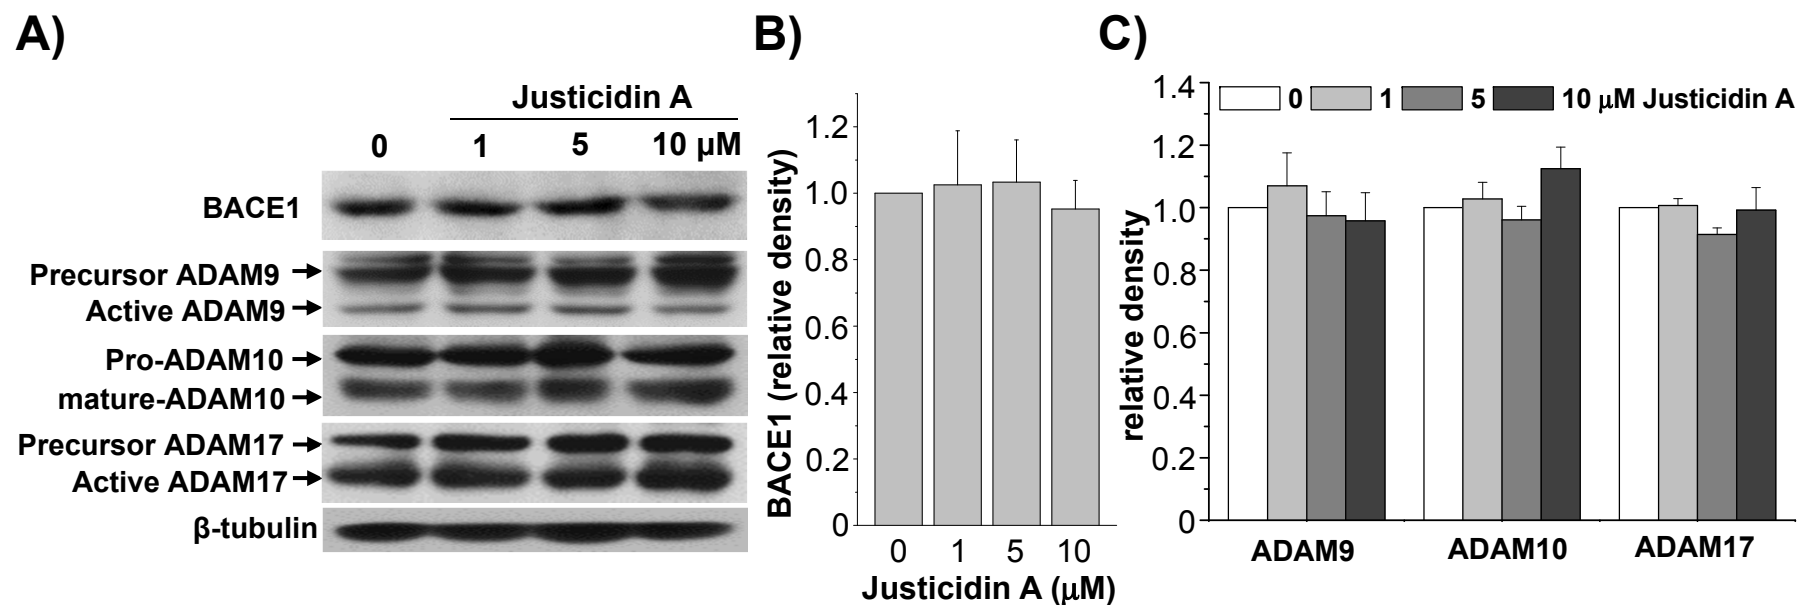

**Supplementary Fig. 1** The expression levels of BACE1, and ADAMs were not changed by justicidin A. **(A)** Cells were incubated with indicated concentrations of justicidin A for 4 h. Cells lysates were obtained for the detection of BACE1, and ADAMs levels. Representative Western blots are shown for BACE1, ADAM9, ADAM10, and ADAM17. **(B, C)** Bars indicate the levels of BACE1 (B) and ADAMs (C) obtained from densitometric analysis of Western bands in (A) (n = 4)

## Supplementary Fig. 2

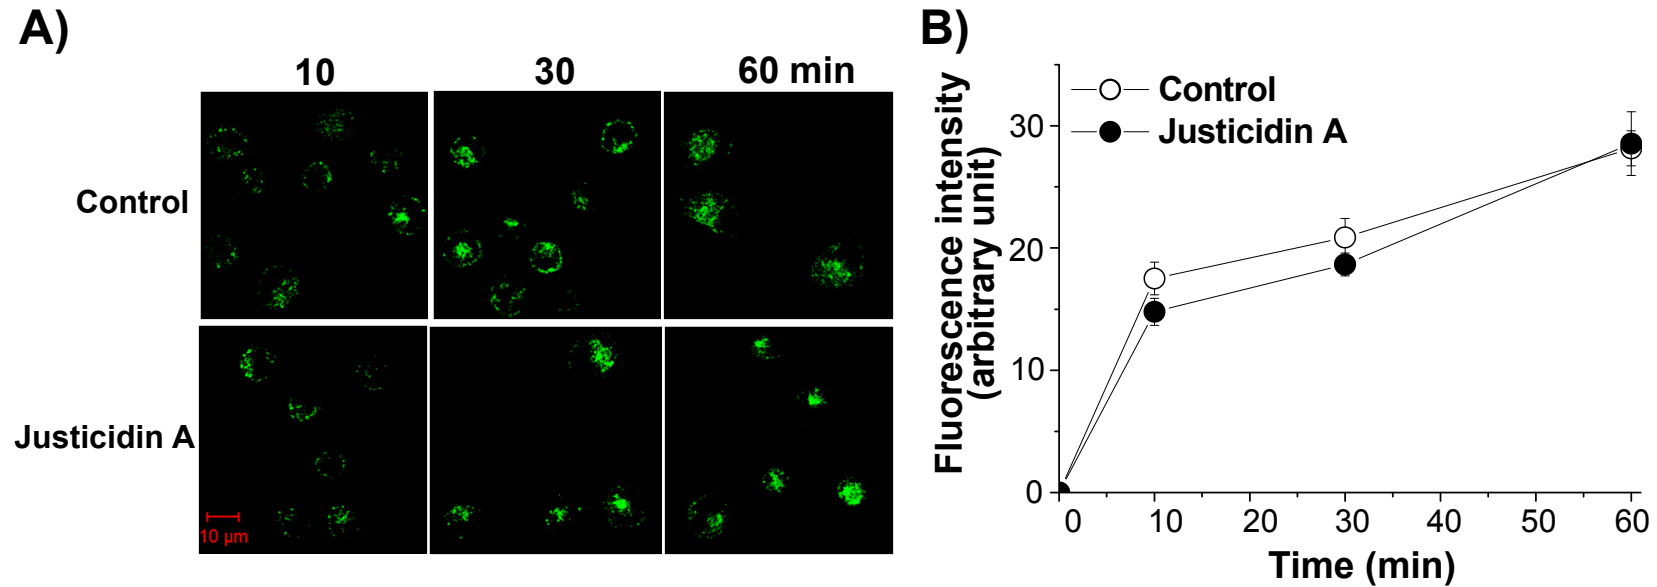

**Supplementary Fig. 2 Endocytosis rate of transferrin was not changed by justicidin A.** (A) Justicidin A did not affect the endocytosis rate of transferrin. Cells were incubated with Alexa Fluor 488-transferrin at 37°C for various time periods in the presence of 1  $\mu$ M justicidin A. Remaining transferrin at the cell membrane was removed by acidic treatment, followed by observation under a fluorescence microscope. (B) Transferrin fluorescence intensities were obtained using Image J software (n = 50).
